# Supplementary material for: A Combined Cell-Worm Approach to Search for Compounds Counteracting the Toxicity of Tau Oligomers in Vivo
Source: Preprints.org preprint supplement (doi:10.20944/preprints202207.0411.v1), 2022-07-27
Supplement: Supplementary file 1 [file supplementary]

*Supplementary Materials*

A combined cell-worm approach to search for compounds counteracting the toxicity of tau oligomers *in vivo*

Carmina Natale 1, Maria Monica Barzago 1,Luca Colnaghi 1,2, Ada De Luigi 1, Franca Orsini 3, Luana Fioriti 3, *, Luisa Diomede 1, *

| **Citation:** Lastname, F.; Lastname, F.; Lastname, F. Title. *Int. J. Mol. Sci.* **2022**, *23*, x. https://doi.org/10.3390/xxxxx  Academic Editor: Firstname Lastname  Received: date  Accepted: date  Published: date  **Publisher’s Note:** MDPI stays neutral with regard to jurisdictional claims in published maps and institutional affiliations.  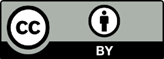  **Copyright:** © 2022 by the authors. Submitted for possible open access publication under the terms and conditions of the Creative Commons Attribution (CC BY) license (https://creativecommons.org/licenses/by/4.0/). |
| --- |

1 Department of Molecular Biochemistry and Pharmacology, Istituto di Ricerche Farmacologiche Mario Negri IRCCS, Via Mario Negri 2, 20156, Milan, Italy; [carmina.natale@marionegri.it](mailto:carmina.natale@marionegri.it) (C.N.) ; [mariamonica.barzago@marionegri.it](mailto:mariamonica.barzago@marionegri.it) (M.M.B.)

2 Current address: Division of Neuroscience, IRCCS San Raffaele Scientific Institute, Via Olgettina 60, 20132 Milan, Italy; School of Medicine, Vita-Salute San Raffaele University, Via Olgettina 58, 20132 Milan, Italy;

[colnaghi.luca@hsr.it](mailto:colnaghi.luca@hsr.it) (L.C.)

3 Department of Neuroscience, Istituto di Ricerche Farmacologiche Mario Negri IRCCS, Via Mario Negri 2, 20156, Milan, Italy; franca.orsini@marionegri.it (F.O.)

***** Correspondence: [luisa.diomede@marionegri.it](mailto:luisa.diomede@marionegri.it) (L.D.); [luana.fioriti@marionegri.it](mailto:luana.fioriti@marionegri.it) (L.F.)


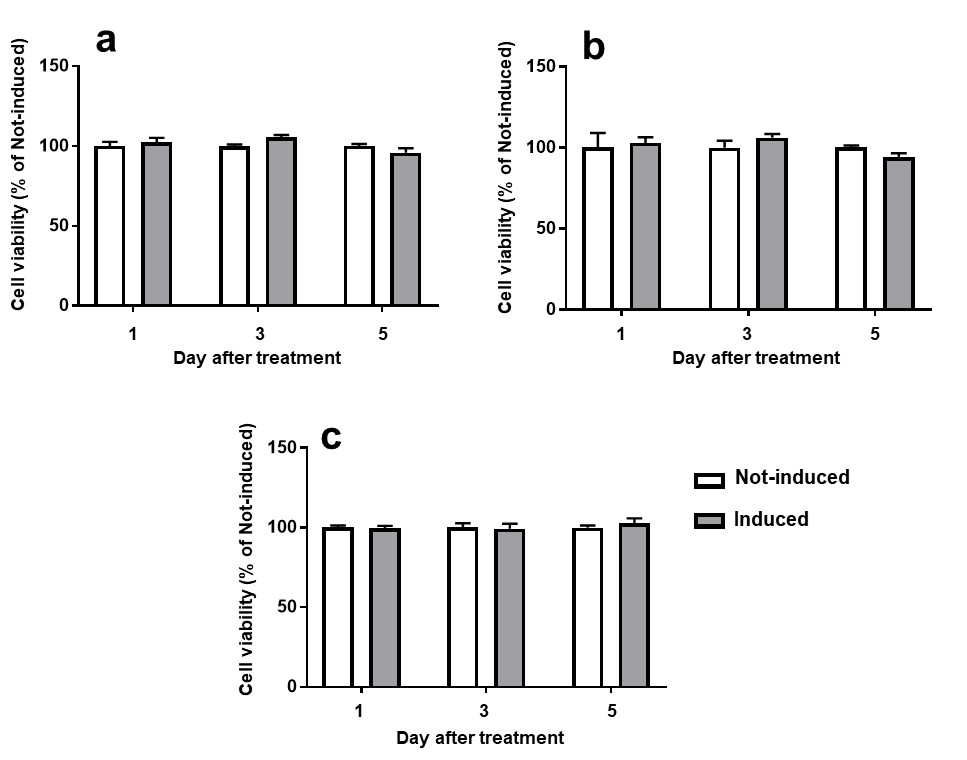


**Figure S1. Tau P301L expression** **did not affect cell viability.** HEK T-Rex cells were treated with 1.0 µg/mL doxycycline to induce the expression of human tau P301L(Induced) or with the same volume of 10 mM PBS, pH 7.4 (Not-induced). Cell viability was recorded 1, 3 and 5 days after treatment,with (**a**) MTT, (**b**) LDH and (**c**) Alamar blue assays. Data are expressed as values normalized on the mean of Not-induced cells from three technical replicates of three independent experiments.


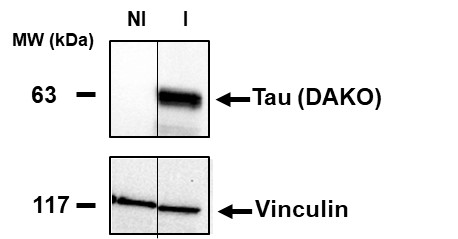


**Figure S2. Western blot of cell lysates prior to immunoprecipitation and used for the input**. Cell lysates were prepared from HEK T-REx cells induced (I) or Not-induced (NI) for 5 days to express tau P301L. Equal amounts of proteins (30µg) were loaded in each lane of gel and immunoblotted withanti-tau antibody (DAKO) or anti-vinculin antibody.


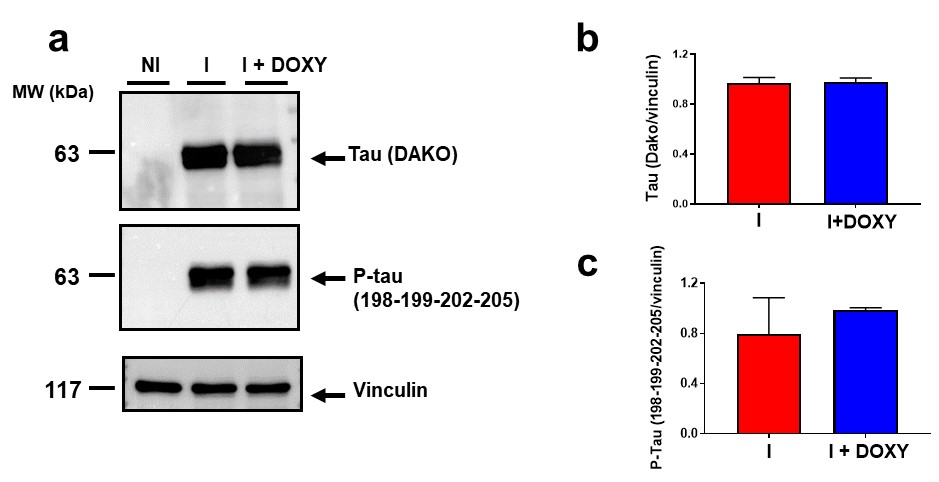


**Figure S3. Effect of Doxy on tau expression.** Representative Western blot of (**a**) total tau and phosphorylated tau (P-Tau) in lysates of HEK T-REx cells induced or not-induced (NI) for 5 days to express TauP301L. Cell lysates of Induced cells (30 µg) were incubated for 2 h with 50 μM Doxy (I+ DOXY) or the same volume of 10 mM PBS, pH 7.4 (I). Equal amounts of proteins (30 µg) were loaded in each gel lane and immunoblotted with **(a)** anti-tau antibody (DAKO), anti P-tau (198-199-202-205) antibody or anti-vinculin antibody. **(b**) Total tau and **(c)** P-tau quantification expressed as the mean volume of the immunoreactive band/vinculin. Data are mean ± SD (N=3).
